# Supplementary material
Source: PubMed Central journal article supplement (PMC4064001)
Supplement: NIHMS551995-supplement-supplement_1.pdf [file NIHMS551995-supplement-supplement_1.pdf]

| <b>Cancer classifications</b>          | <b>Topography code</b>          | <b>Morphology codes</b>                                                                                                                                                |
|----------------------------------------|---------------------------------|------------------------------------------------------------------------------------------------------------------------------------------------------------------------|
| Hepatocellular carcinoma               | C22.0 & C22.1                   | 8170-8175                                                                                                                                                              |
| Other Specified Carcinoma              | C22.0                           | 8012-8013,8124,8142,8161-8162,<br>8180,8190,8211,8240,8246,8249,8255,<br>8290,8310,8323,8337,8440,8450,8453,8470-<br>8471,8500,8503,8510,8521,8550,8574,8576           |
| Poorly Specified Carcinoma             | C22.0                           | 8010,8020,8021,8022,8031,8046,8050                                                                                                                                     |
| Hepatoblastoma                         | C22.0                           | 8970                                                                                                                                                                   |
| Hemangiosarcoma                        | C22.0                           | 9120                                                                                                                                                                   |
| Hemangioendothelioma                   | C22.0                           | 9130,9133                                                                                                                                                              |
| Other Sarcoma                          | C22.0                           | 8800-8805,8810,8815,8830,8850,8852,8890,<br>8891,8894-8896,8900,8910,8920,8935,8936,<br>8940,8963,8990,9040,9041,9124,9150,9180,<br>9220,9260,9364,9473,9500,9540,9560 |
| Embryonal Sarcoma                      | C22.0                           | 8991                                                                                                                                                                   |
| Germ Cell Tumors                       | C22.0                           | 9064,9070,9071,9080,9100                                                                                                                                               |
| Melanomas, Carcinosarcomas             | C22.0                           | 8720,8980                                                                                                                                                              |
| Cholangiocarcinoma                     | C22.1 & C22.0<br>(intrahepatic) | 8032-8033, 8041, 8070-8071, 8140-8141,<br>8160, 8260, 8480, 8481, 8490, 8560                                                                                           |
|                                        | C24.0<br>(extrahepatic)         | 8032-8033, 8041, 8070-8071, 8140-8141,<br>8160, 8260, 8480, 8481, 8490, 8560                                                                                           |
| Other intrahepatic bile duct cancers   | C22.1                           | All morphology codes except 8170-8175,<br>8032-8033, 8041, 8070-8071, 8140-8141,<br>8160, 8260, 8480, 8481, 8490, 8560                                                 |
| Other Extrahepatic bile duct cancers   | C24.0                           | All morphology codes except 8032-8033,<br>8041, 8070-8071, 8140-8141, 8160, 8260,<br>8480, 8481, 8490, 8560                                                            |
| Malignant neoplasms of the gallbladder | C23                             | All morphology codes*                                                                                                                                                  |

|                                      |       |                       |
|--------------------------------------|-------|-----------------------|
| Ampulla of Vater                     | C24.1 | All morphology codes* |
| Overlapping lesions of biliary tract | C24.8 | All morphology codes* |
| Biliary tract, NOS                   | C24.9 | All morphology codes* |

---

\*Except Kaposi's sarcoma: 9140, Mesothelioma: 9050-9055, Poorly specified malignancies: 8000-8005, Hematologic Malignancies: 9590-9989

Supplementary Table 2. RRs for HBV and HCC, HCV and HCC, and PSC and cholangiocarcinoma adjusted for year of transplant

| Variable | Outcome      | Original unadjusted estimates |       |      | Adjusted for year of transplant |       |      |       |
|----------|--------------|-------------------------------|-------|------|---------------------------------|-------|------|-------|
|          |              | RR                            | LCL   | UCL  | RR                              | LCL   | UCL  |       |
| HBV      | Active       | HCC                           | 3.24  | 1.31 | 6.89                            | 3.73  | 1.50 | 8.03  |
|          | Resolved     | HCC                           | 1.79  | 0.85 | 3.41                            | 2.13  | 1.00 | 4.11  |
|          | Unknown      | HCC                           | 1.04  | 0.40 | 2.22                            | 1.20  | 0.46 | 2.57  |
| HCV      | Seropositive | HCC                           | 10.01 | 5.88 | 16.93                           | 12.92 | 7.47 | 22.23 |
|          | Unknown      | HCC                           | 1.65  | 0.72 | 3.34                            | 1.88  | 0.81 | 3.82  |
| PSC      | Non-liver    | Cholangiocarcinoma            | 12.26 | 4.13 | 36.40                           | 12.41 | 4.17 | 37.01 |

Supplementary Tables 3. Association between cholangiocarcinoma and azathioprine stratified by year of transplant

| Year of transplant | Azathioprine | No. Cases | RR   | LCL  | UCL  |
|--------------------|--------------|-----------|------|------|------|
| All years          | No           | 24        | 1.00 |      |      |
|                    | Yes          | 18        | 1.99 | 1.05 | 3.70 |
| 1987-1994          | No           | 3         | 1.00 |      |      |
|                    | Yes          | 12        | 1.54 | 0.47 | 6.89 |
| 1995-1999          | No           | 6         | 1.00 |      |      |
|                    | Yes          | 5         | 2.80 | 0.78 | 9.64 |
| 2000-2004          | No           | 12        | 1.00 |      |      |
|                    | Yes          | 1         | 1.41 | 0.08 | 7.33 |
| 2005-2008          | No           | 3         | ---  | ---  | ---  |
|                    | Yes          | 0         |      |      |      |

Supplemental Table 4. Association of hepatocellular carcinoma (HCC) and cholangiocarcinoma with immunosuppressive medication by type of solid organ transplant

| Medication                   | Organ type | No. Cases | HCC         |             |             | No. Cases | Cholangiocarcinoma |             |             |
|------------------------------|------------|-----------|-------------|-------------|-------------|-----------|--------------------|-------------|-------------|
|                              |            |           | RR*         | LCL         | UCL         |           | RR*                | LCL         | UCL         |
| Any induction therapy        | All        | 27        | 0.92        | 0.56        | 1.49        | 14        | 0.99               | 0.49        | 1.93        |
|                              | Liver      | 2         | 0.60        | 0.10        | 1.99        | 0         | ---                | ---         | ---         |
|                              | Non-liver  | 25        | 0.96        | 0.56        | 1.63        | 14        | 1.16               | 0.55        | 2.46        |
| cyclosporine                 | All        | 49        | 1.35        | 0.87        | 2.11        | 25        | 1.49               | 0.79        | 2.88        |
|                              | Liver      | 15        | 1.90        | 0.92        | 3.95        | 7         | 1.90               | 0.64        | 5.61        |
|                              | Non-liver  | 34        | 1.10        | 0.65        | 1.92        | 18        | 1.36               | 0.64        | 3.08        |
| tacrolimus                   | All        | 30        | 0.71        | 0.44        | 1.12        | 13        | 0.59               | 0.29        | 1.14        |
|                              | Liver      | 16        | 0.71        | 0.35        | 1.49        | 8         | 0.84               | 0.29        | 2.57        |
|                              | Non-liver  | 14        | 0.70        | 0.37        | 1.26        | 5         | 0.43               | 0.14        | 1.04        |
| azathioprine                 | All        | 29        | 1.32        | 0.83        | 2.07        | 18        | <b>1.99</b>        | <b>1.05</b> | <b>3.70</b> |
|                              | Liver      | 8         | 1.44        | 0.60        | 3.12        | 4         | 1.58               | 0.43        | 4.76        |
|                              | Non-liver  | 21        | 1.32        | 0.75        | 2.27        | 14        | <b>2.39</b>        | <b>1.12</b> | <b>5.13</b> |
| mycophenolate mofetil or MMF | All        | 31        | 0.70        | 0.44        | 1.09        | 15        | 0.67               | 0.34        | 1.27        |
|                              | Liver      | 4         | <b>0.35</b> | <b>0.10</b> | <b>0.90</b> | 5         | 1.33               | 0.40        | 3.93        |
|                              | Non-liver  | 27        | 0.85        | 0.50        | 1.44        | 10        | <b>0.46</b>        | <b>0.20</b> | <b>0.99</b> |
| mTOR inhibitors              | All        | 1         | 0.24        | 0.01        | 1.07        | 1         | 0.49               | 0.03        | 2.27        |
|                              | Liver      | 0         | ---         | ---         | ---         | 0         | ---                | ---         | ---         |
|                              | Non-liver  | 1         | 0.31        | 0.02        | 1.39        | 1         | 0.63               | 0.04        | 2.96        |
| steroids                     | All        | 81        | 1.78        | 0.80        | 5.06        | 39        | 1.42               | 0.51        | 5.87        |
|                              | Liver      | 28        | 1.54        | 0.46        | 9.54        | 14        | ---                | ---         | ---         |
|                              | Non-liver  | 53        | 1.93        | 0.71        | 7.91        | 25        | 0.92               | 0.32        | 3.88        |

\*Adjusted for gender, age, and race

Supplemental Table 5. Comparison of independent models for risk factors for hepatocellular carcinoma versus mutually adjusted models. All models adjusted for gender, age, race/ethnicity, and type of organ transplanted.

|                       | Independent models |      |      | Mutually adjusted models |      |      |
|-----------------------|--------------------|------|------|--------------------------|------|------|
|                       | OR                 | LCL  | UCL  | OR                       | LCL  | UCL  |
| <b>HBV</b>            |                    |      |      |                          |      |      |
| Uninfected            | 1.0                |      |      | 1.0                      |      |      |
| Active                | 3.2                | 1.3  | 6.9  | 2.3                      | 0.7  | 5.7  |
| Resolved              | 1.8                | 0.8  | 3.4  | 1.0                      | 0.5  | 2.0  |
| Unknown               | 1.0                | 0.4  | 2.2  | 2.3                      | 0.5  | 7.8  |
| <b>HCV</b>            |                    |      |      |                          |      |      |
| Negative              | 1.0                |      |      | 1.0                      |      |      |
| Positive              | 10.0               | 5.9  | 16.9 | 12.3                     | 7.0  | 22.2 |
| Unknown               | 1.7                | 0.7  | 3.3  | 0.9                      | 0.2  | 4.1  |
| <b>BMI</b>            |                    |      |      |                          |      |      |
| Underweight           | 2.5                | 0.9  | 5.9  | 4.4                      | 1.3  | 11.4 |
| Normal                | 1.0                |      |      | 1.0                      |      |      |
| Overweight            | 0.8                | 0.5  | 1.3  | 0.9                      | 0.5  | 1.6  |
| Obese                 | 0.6                | 0.3  | 1.2  | 0.5                      | 0.2  | 1.1  |
| <b>Diabetes</b>       |                    |      |      |                          |      |      |
| No                    | 1.0                |      |      | 1.0                      |      |      |
| Insulin-dependent     | 1.3                | 0.6  | 2.5  | 1.5                      | 0.7  | 3.0  |
| Non-insulin-dependent | 2.5                | 1.2  | 4.8  | 2.9                      | 1.4  | 5.6  |
| Unknown dependency    | 3.9                | 0.6  | 13.1 | 3.4                      | 0.6  | 11.4 |
| Unknown               | 0.3                | 0.02 | 1.5  | 0.3                      | 0.02 | 1.5  |

Supplemental Figure 1. Distribution of hepatobiliary cancer cases by months from transplant to the diagnosis of hepatobiliary cancer.

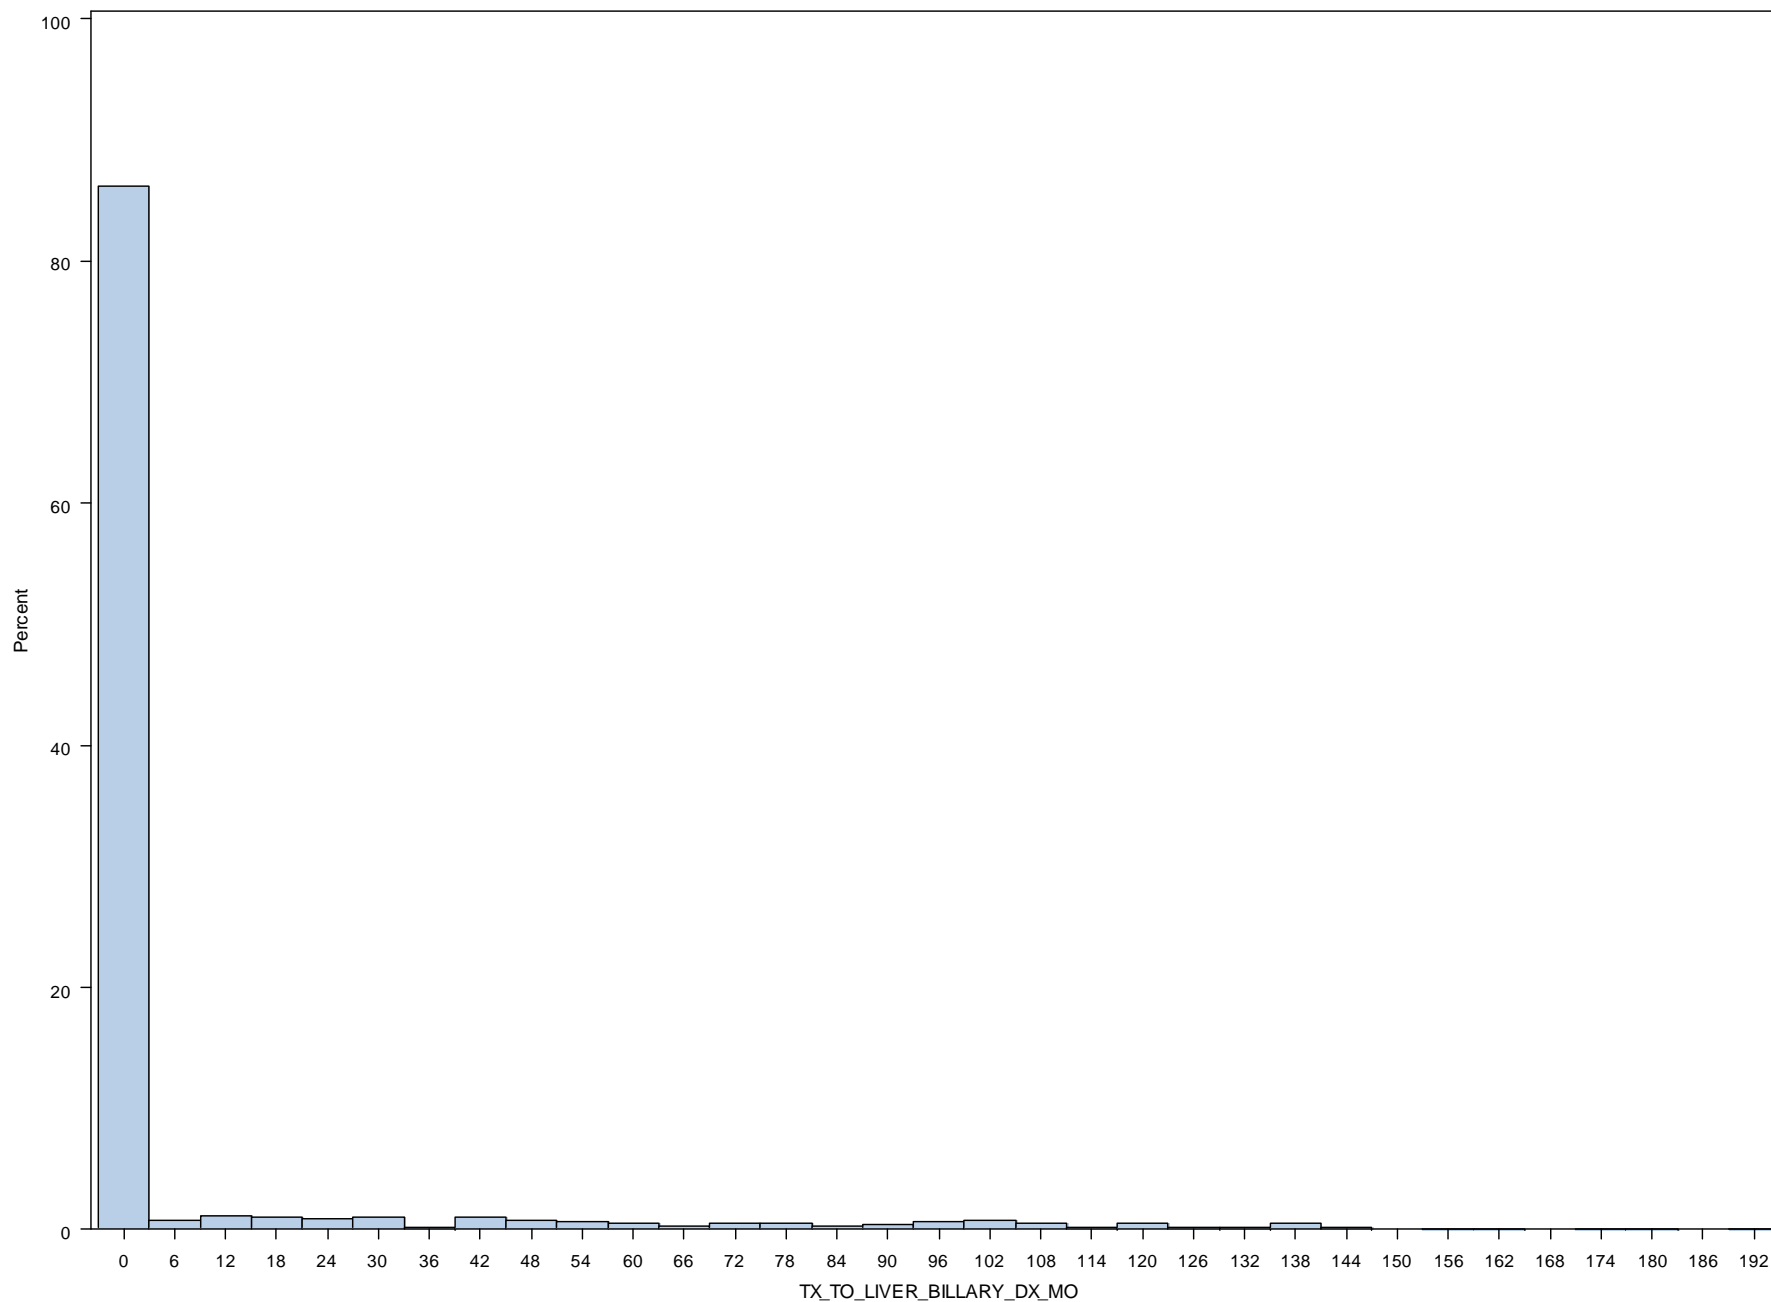

The large proportion (>80%) of cases diagnosed within 6 months of transplantation is consistent with delayed diagnoses of cancers that were present before transplantation.

Supplemental Methods. Subjects were considered HCV seropositive based on enzyme immunoassay for HCV antibodies.<sup>11</sup> Only 0.13% of the cohort was positive for anti-HBc and unknown for HBsAg. Of those positive for anti-HBc (N=35118), 29634 (84%) were negative for HBsAg, 4823 (14%) were positive for HBsAg, and 661 (2%) were unknown. Therefore, recipients who were positive for anti-HBc and unknown for HBsAg were likely negative for HBsAg. In addition, most people with an HBV-related reason for transplant had active (65%) or resolved (17%) infection. Similarly, 81.0% of people with an HCV-related reason for transplant were HCV seropositive, suggesting our classification is generally accurate.
